# Supplementary material for: Chemical accuracy for ligand-receptor binding Gibbs energies through multi-level SQM/QM calculations
Source: Royal Society of Chemistry journal article supplement (doi:10.1039/d4cp01529k), 2024-01-01
Supplement: d4cp01529k1.pdf [file d4cp01529k1.pdf]

# Supplementary Information

## **Chemical accuracy for ligand-receptor binding Gibbs energies through multi-level SQM/QM calculations**

Froze Jameel<sup>a</sup> and Matthias Stein<sup>a,\*</sup>

<sup>a</sup>Molecular Simulations and Design Group, Max Planck Institute for Dynamics of Complex Technical Systems, Sandtorstrasse 1, 39106 Magdeburg

Corresponding author: Matthias Stein, [matthias.stein@mpi-magdeburg.mpg.de](mailto:matthias.stein@mpi-magdeburg.mpg.de)

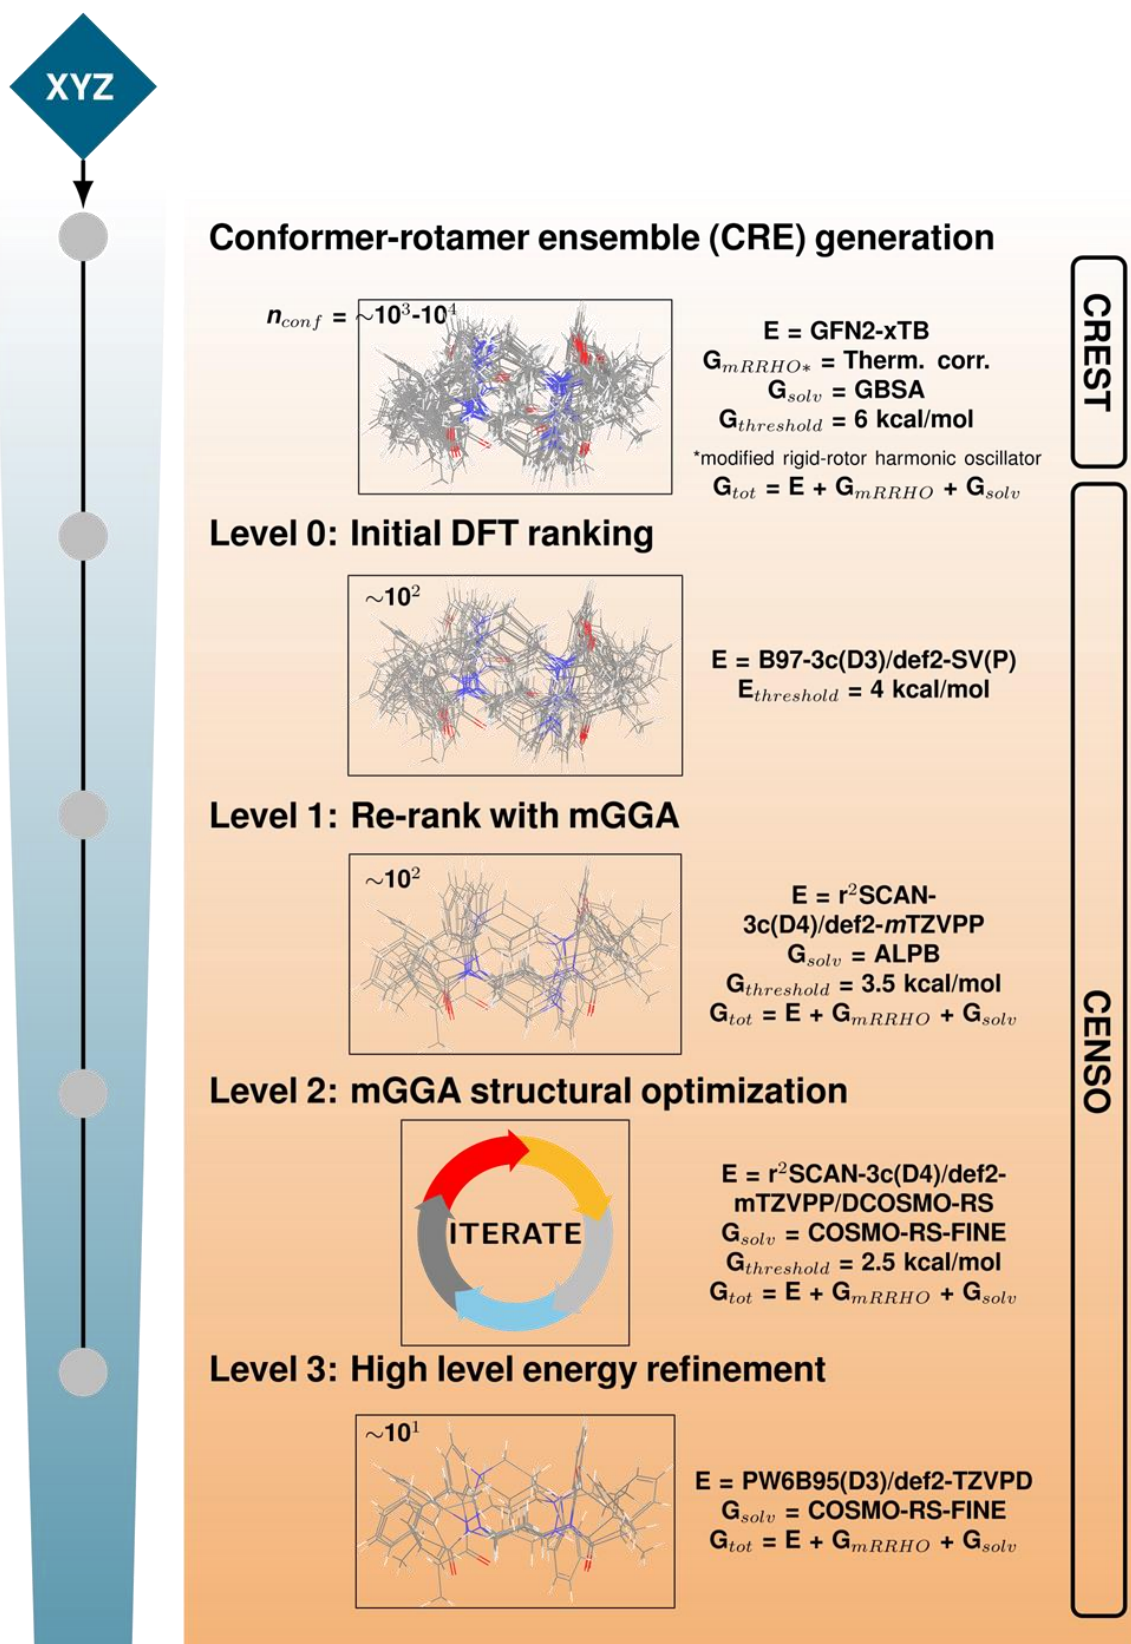

**Figure S1.** Schematic workflow used for conformational space exploration and sequential refinement of SAMPL8 and SAMPL9 ligand-receptor systems.

## Details of calculated Gibbs energies of binding and their deviation from experiment

### SAMPL8

**Table S1.** Experimental and calculated Gibbs energies of binding of ‘drugs of abuse’ molecules **G1 – G9** to CB[8] in kcal/mol.

|           | <b>Exp.</b> | <b>GFN2</b> | <b>Level 0</b> | <b>Level 1</b> | <b>Level 2</b> | <b>Level 3</b> |
|-----------|-------------|-------------|----------------|----------------|----------------|----------------|
| <b>G1</b> | -7.05       | -12.22      | -26.56         | -8.49          | -6.53          | -7.60          |
| <b>G2</b> | -9.94       | -11.14      | -24.72         | -7.46          | -5.70          | -8.00          |
| <b>G3</b> | -11.6       | -16.31      | -28.75         | -17.16         | -8.43          | -13.87         |
| <b>G4</b> | -11.2       | -16.13      | -31.44         | -17.34         | -14.32         | -15.86         |
| <b>G5</b> | -12.3       | -12.95      | -26.07         | -5.11          | -10.84         | -14.22         |
| <b>G6</b> | -14.1       | -11.3       | -19.78         | -9.46          | -10.03         | -14.52         |
| <b>G7</b> | -7.93       | -13.54      | -31.69         | -15.03         | -5.08          | -8.09          |
| <b>G8</b> | -9.18       | -7.9        | -27.87         | -5.37          | -7.39          | -5.61          |
| <b>G9</b> | -10.2       | -8.13       | -28.17         | -7.05          | -9.40          | -11.09         |

**Table S2.** Effect of the choice of solvent model for Level 2 calculations for SAMPL8 entries.

| <b>Gibbs energy of binding to CB[8] in kcal/mol</b> | <b>r<sup>2</sup>SCAN-3c/def2-mTZVP</b> |                 |             |
|-----------------------------------------------------|----------------------------------------|-----------------|-------------|
|                                                     | <b>Exp.</b>                            | <b>COSMO-RS</b> | <b>ALPB</b> |
| <b>G1</b>                                           | -7.05                                  | -6.53           | -9.10       |
| <b>G2</b>                                           | -9.94                                  | -5.70           | -9.18       |
| <b>G3</b>                                           | -11.6                                  | -8.43           | -18.81      |
| <b>G4</b>                                           | -11.2                                  | -14.32          | -15.95      |
| <b>G5</b>                                           | -12.3                                  | -10.84          | -11.67      |
| <b>G6</b>                                           | -14.1                                  | -10.03          | -11.61      |
| <b>G7</b>                                           | -7.93                                  | -5.08           | -16.17      |
| <b>G8</b>                                           | -9.18                                  | -7.39           | -8.41       |
| <b>G9</b>                                           | -10.2                                  | -9.40           | -11.13      |
| <b>MAD</b>                                          |                                        | 2.45            | 3.09        |

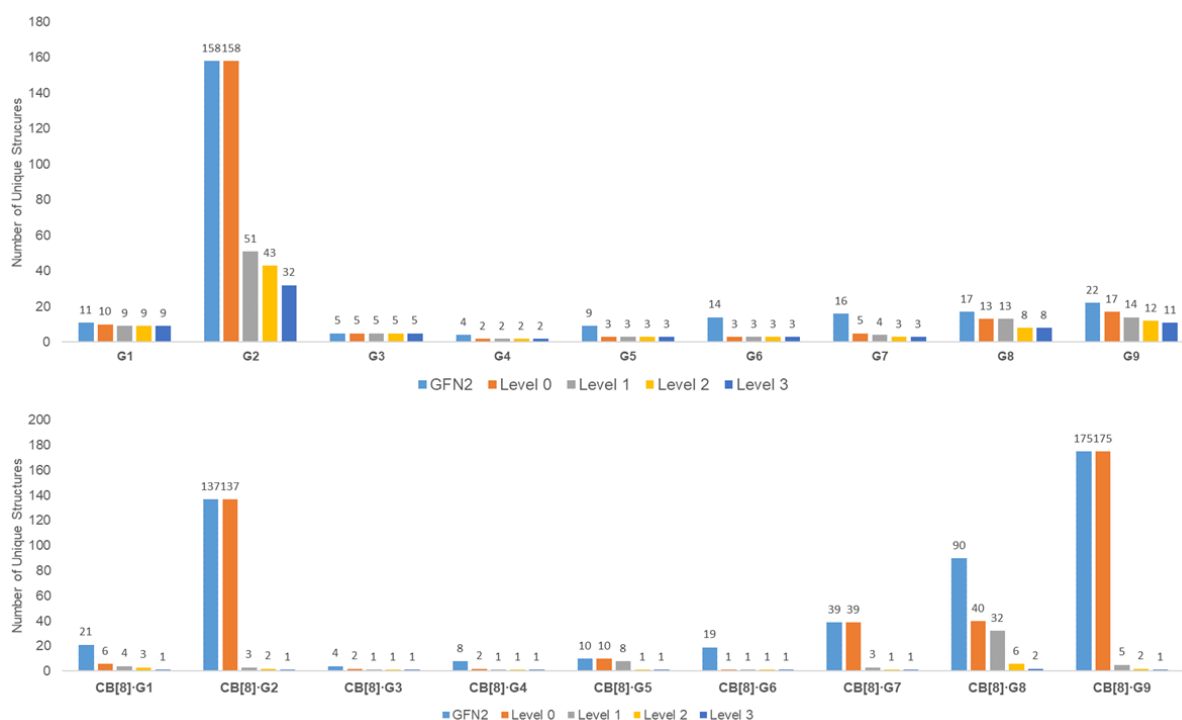

**Figure S2.** Number of unique structures of ligands **G1 – G9** (top) and ligand-receptor complexes (bottom) for SAMPL8 at all levels of SQM and QM calculations.

## Details of calculated Gibbs energies of binding and their deviation from experiment

### SAMPL9

**Table S3.** Experimental and calculated Gibbs energies of binding of phenothiazine drug molecules to  $\beta$ -CD in kcal/mol.

|                              | Exp.  | GFN2  | Level 0 | Level 1 | Level 2 | Level 3 |
|------------------------------|-------|-------|---------|---------|---------|---------|
| <b>Promazine (PMZ)</b>       | -4.97 | 15.85 | -7.51   | -8.03   | -7.14   | -5.41   |
| <b>Promethazine (PMT)</b>    | -4.47 | 16.42 | -9.88   | -5.89   | -7.00   | -5.36   |
| <b>Chlorpromazine (CPZ)</b>  | -5.42 | 13.68 | -12.17  | -7.17   | -7.15   | -6.67   |
| <b>Thioridazine (TDZ)</b>    | -5.71 | 13.11 | -11.22  | -10.67  | -8.30   | -5.47   |
| <b>Trifluoperazine (TFP)</b> | -5.06 | 8.98  | -8.97   | -4.41   | -8.15   | -5.47   |

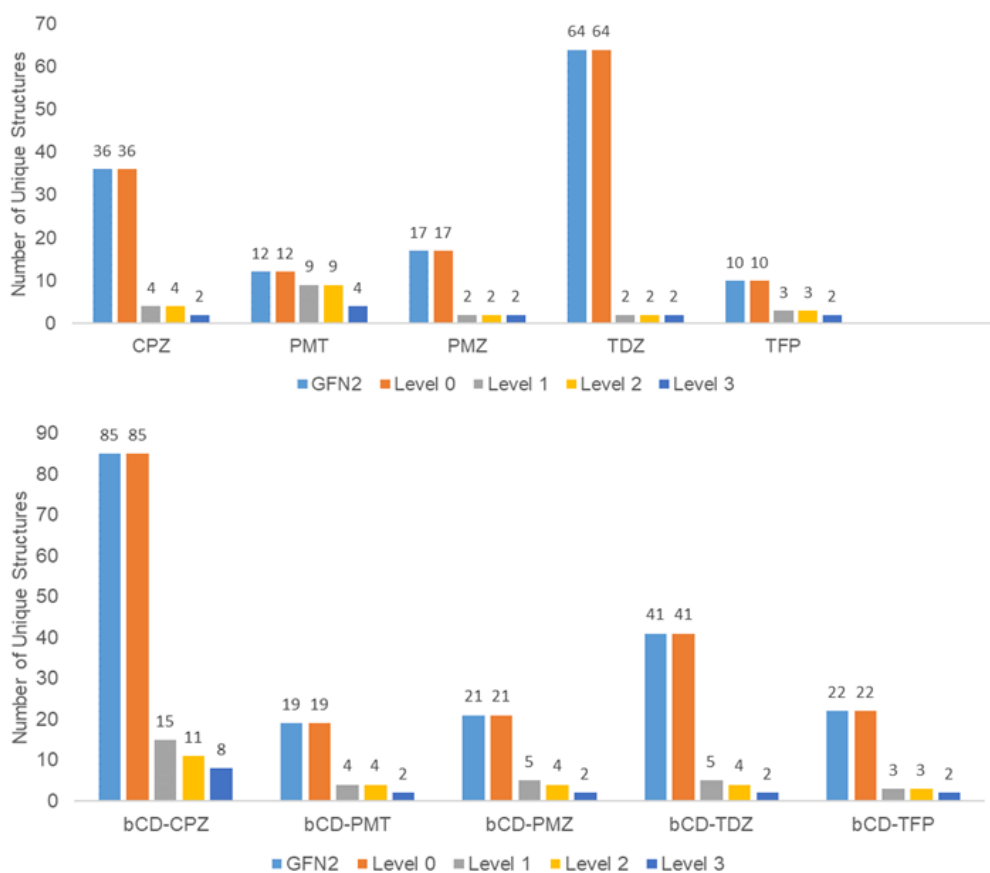

**Figure S2.** Number of unique structures of phenthiazine ligands (top) and ligand-receptor complexes (bottom) for SAMPL9 at all levels of SQM and QM calculations.

**Table S4.** Effect of choice of COSMO-RS level on Gibbs solvation energy for SAMPL8 entries in kcal/mol.

|           | Exp.  | COSMO-RS Model |        |
|-----------|-------|----------------|--------|
|           |       | FINE           | Normal |
| <b>G1</b> | -7.05 | -7.60          | -12.3  |
| <b>G2</b> | -9.94 | -8.00          | -10.13 |
| <b>G3</b> | -11.6 | -13.87         | -13.49 |
| <b>G4</b> | -11.2 | -15.86         | -14.62 |
| <b>G5</b> | -12.3 | -14.22         | -17.36 |
| <b>G6</b> | -14.1 | -14.52         | -18.31 |

|            |       |        |        |
|------------|-------|--------|--------|
| <b>G7</b>  | -7.93 | -8.09  | -7.02  |
| <b>G8</b>  | -9.18 | -5.61  | -13.58 |
| <b>G9</b>  | -10.2 | -11.09 | -15.18 |
| <b>MAD</b> |       | 1.64   | 1.85   |

**Table S5.** Effect of choice of COSMO-RS level on Gibbs solvation energy for SAMPL9 entries.

|             | <b>G<sub>solv</sub> [Eh]</b> |                          | <b>ΔG<sub>solv</sub> [kcal/mol]</b> |
|-------------|------------------------------|--------------------------|-------------------------------------|
|             | <b>COSMO-RS<br/>NORMAL</b>   | <b>COSMO-RS<br/>FINE</b> |                                     |
| bCD         | -0.1459969                   | -0.1428208               | -1.99                               |
| TDZ Ligand  | -0.0590136                   | -0.0475236               | -7.21                               |
| TDZ Complex | -0.1936377                   | -0.1932459               | -0.25                               |
| CPZ Ligand  | -0.0648921                   | -0.0527661               | -7.61                               |
| CPZ Complex | -0.1994703                   | -0.2002071               | 0.46                                |
| PMT Ligand  | -0.0630955                   | -0.049636                | -8.45                               |
| PMT Complex | -0.2026583                   | -0.1989436               | -2.33                               |
| PMZ Ligand  | -0.0615527                   | -0.049128                | -7.80                               |
| PMZ Complex | -0.2003445                   | -0.2014822               | 0.71                                |
| TFP Ligand  | -0.0786545                   | -0.0613064               | -10.89                              |
| TFP Complex | -0.2062826                   | not converged            |                                     |
